# Supplementary material for: QTL Mapping for Domestication-Related Characteristics in Field Cress (Lepidium campestre)—A Novel Oil Crop for the Subarctic Region
Source: Genes (Basel). 2020 Oct 19;11(10):1223. doi: 10.3390/genes11101223 (PMC7603098; doi:10.3390/genes11101223)
Supplement: Supplementary file 1 [file genes-11-01223-s001.xlsx]

## Sheet: Figure S1a_PH 
Figure S1a. Lepidium plants showing differences in plant height (PH) and stem growth orientation (SO): (A) a short plant with semi-erect stems, and (B) a relatively tall plant with erect stem

## Sheet: Figure S1b-NS
Figure S1b. Lepidium plants showing difference in number of stems per plant (PS) : (A) an erect plant with a single stem, and (B) an erect plant with multiple stems

## Sheet: Figure S1c_SO
Figure S1c. Lepidium plants showing difference in stem growth orientation (SO): (A) an erect plant with multiple stems, and (B) a creeping plant with multiple stems

## Sheet: Figure S1d_FH
Figure S1d. Lepidium plants showing difference in flowering habit (FH): (A) a bushy plant with indeterminate flowering containing both maturing pods and flower buds, and (B) a determinate plant ending its flowering

## Sheet: Figure S1e_ER
Figure S1e. Lepidium breeding lines showing difference in earliness (ER) in a field: (A) an early flowering type, and (B) a late flowering type

## Sheet: Figure S1f-SY
Figure S1f. Lepidium plants at a mulch site showing differences in seed yield per plant (SY): (A) a high yielding mature plant characterized by a medium plant height and a high pod shattering, and (B) a mature plant with medium seed yield characterized by short plant height and high pod shattering

## Sheet: Figure S1g-SHR
Figure S1g. Mature lepidium plants at a mulch site showing contrasting characters in pod shattering resistance (SHR): (A) a highly susceptible plant to pod shattering that lost almost all of its seeds after exposure to heavy rain and strong wind; (b) a highly resistant plant to pod shattering at the same site maintaing its seeds after exposure to heavy rain and strong wind.

## Sheet: Figure-S1h-PE
Figure S1h. (A) a biennial lepidium plant in a pot, which completely dried after the first harvest, (B) Ratooning perennial lepidium plants in a pot after the first harvest
